# Supplementary material for: Pioglitazone Modifies Kupffer Cell Function and Protects against Escherichia coli-Induced Bacteremia in Burned Mice
Source: MDPI journal article supplement (doi:10.3390/ijms232112746), 2022-10-22
Supplement: s1 [file s1]

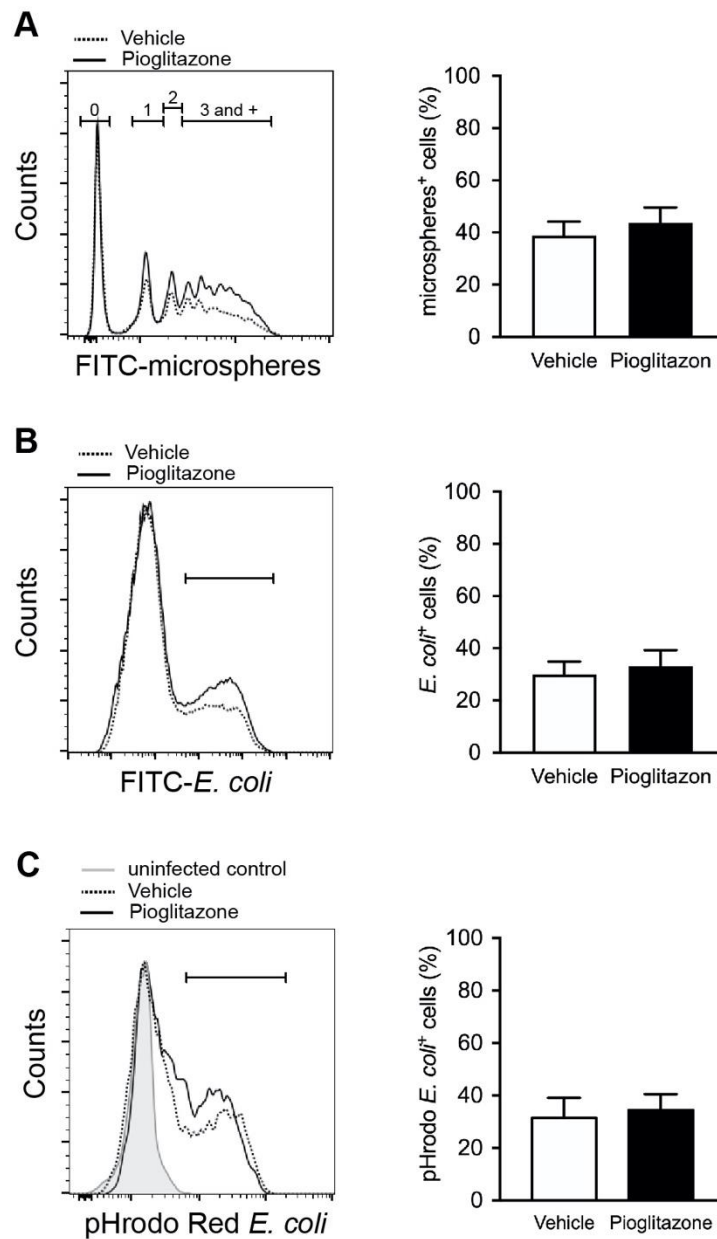

**Figure S1.** Phagocytosis and bactericidal activity of CD11b<sup>+</sup> F4/80<sup>low</sup> infiltrated monocytes/macrophages in vehicle- and pioglitazone-treated mice after burns. (**A,B**) Isolated hepatic immune cells were incubated with fluorescein-conjugated microspheres or *Escherichia coli* for 30 min and stained with anti-CD45, anti-CD11b, and F4/80 antibodies, followed by the analysis of phagocytic activity in F4/80<sup>low</sup> cells via flow cytometry. (**A**) Representative flow cytometry histogram showing uptake of FITC-microspheres by F4/80<sup>low</sup> cells. Percentage of F4/80<sup>low</sup> cells which has internalized  $\geq$  three microspheres was determined. (**B**) Representative histograms showing phagocytosis of FITC-conjugated *E. coli* by F4/80<sup>low</sup> cells and percentage of FITC-conjugated *E. coli*. (**C**) Representative flow cytometry histogram showing a shift in fluorescence intensity of pHrodo *E. coli* bioparticles in F4/80<sup>low</sup> cells. Percentage of *E. coli* particle-positive F4/80<sup>low</sup> cells in vehicle and pioglitazone-treated mice 20 min after administration of pHrodo *E. coli*. n = 6 per group; Data are represented as the mean  $\pm$  deviation (SD).
